# Supplementary material
Source: publisher site journal article supplement (https://en-cdn.bio-protocol.org/attached/file/20180817/2986%20Supplemental%20file.docx)
Supplement: Supplementary file 1 [file 2986%20Supplemental%20file.docx]

α-synuclein (GenBank: CR457058.1):

1 atggatgtat tcatgaaagg actttcaaag gccaaggagg gagttgtggc tgctgctgag

61 aaaaccaaac agggtgtggc agaagcagca ggaaagacaa aagagggtgt tctctatgta

121 ggctccaaaa ccaaggaggg agtggtgcat ggtgtggcaa cagtggctga gaagaccaaa

181 gagcaagtga caaatgttgg aggagcagtg gtgacgggtg tgacagcagt agcccagaag

241 acagtggagg gagcagggag cattgcagca gccactggct ttgtcaaaaa ggaccagttg

301 ggcaagaatg aagaaggagc cccacaggaa ggaattctgg aagatatgcc tgtggatcct

361 gacaatgagg cttatgaaat gccttctgag gaagggtatc aagactacga acctgaagct

421 taa
